# Supplementary material for: Pterostilbene reduces endothelial cell injury in vascular arterial walls by regulating the Nrf2-mediated AMPK/STAT3 pathway in an atherosclerosis rat model
Source: PubMed Central journal article supplement — Exp Ther Med. 2019 Nov 18;19(1):45–52. doi: 10.3892/etm.2019.8211 (PMC6909712; doi:10.3892/etm.2019.8211), 2019-11-18

Figure S1. Effect of Pts at different doses on hydrogen peroxide (H<sub>2</sub>O<sub>2</sub>)-induced cytotoxicity in endothelial cell. \*P<0.05 vs. control.

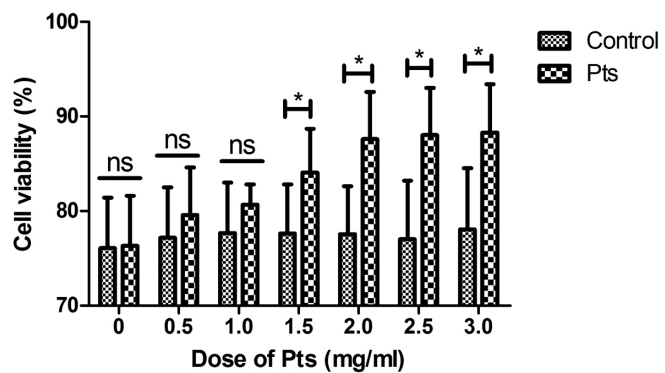

Figure S2. Effect of Pts on the expression levels of phosphorylated Nrf2 (p-Nrf2) and total Nrf2 (t-Nrf2) in endothelial cell. (A) Expression of p-Nrf2 and t-Nrf2 in Pts-treated endothelial cell. (B) Ratio of p-Nrf2/t-Nrf2 in Pts-treated endothelial cell. \*\*P<0.01 vs. control.

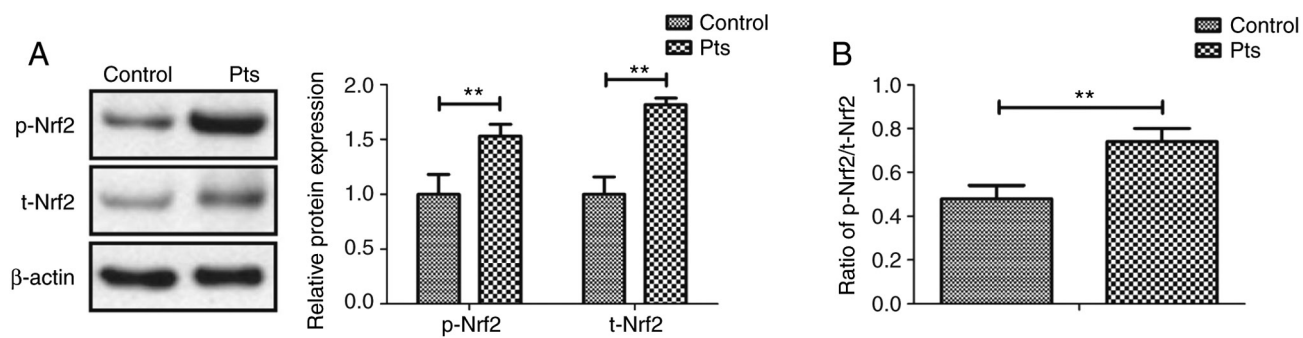

Supplement: Supplementary_Data.pdf [file Supplementary_Data.pdf]
